# Supplementary material for: Molecularly imprinted polymeric coatings for sensitive and selective gravimetric detection of artemether
Source: Royal Society of Chemistry journal article supplement (doi:10.1039/d0ra04785f), 2020-01-01
Supplement: d0ra04785f1.pdf [file d0ra04785f1.pdf]

# Molecularly Imprinted Polymeric Coatings for Sensitive and Selective Gravimetric Detection of Artemether

## Supporting Information

Usman Arshad<sup>1</sup>, Adnan Mujahid\*<sup>1</sup>, Peter Lieberzeit<sup>2</sup>, Adeel Afzal\*<sup>3</sup>, Sadia Zafar Bajwa<sup>4</sup>, Naseer Iqbal<sup>3</sup>, Sumaira Roshan<sup>1</sup>

<sup>1</sup> Institute of Chemistry, University of the Punjab, Lahore-54590, Pakistan

<sup>2</sup> Department of Physical Chemistry, University of Vienna, Waehringer Strasse 42, A-1090, Vienna, Austria

<sup>3</sup> Department of Chemistry, College of Science, University of Hafr Al Batin, PO Box 1803, Hafr Al Batin, 39524, Saudi Arabia

<sup>4</sup> National Institute for Biotechnology and Genetic Engineering, Jhang Road, Faisalabad, Pakistan

\* Corresponding authors. Email: [adnan.mujahid@pu.edu.pk](mailto:adnan.mujahid@pu.edu.pk); [aa@aafzal.com](mailto:aa@aafzal.com)

### Content

**Table S1.** Recipes using different combinations of monomers and solvents for the synthesis of MIPs at 60°C.

**Figure S1.** A schematic of the MIP-QCM sensor showing the fabrication of MIP on the surface of Au electrode. The prepolymer containing self-organized oligomers and template molecules are spin coated and polymerized to fabricate MIP-QCM sensors for artemether detection. The non-covalent interactions such as hydrogen bonds between H-bond acceptor artemether and H-bond donor methacrylic acid derive imprinting and impart selectivity to the MIP.

**Figure S2.** (a) The sensor response of MIP-QCM and NIP-QCM layers after a week of testing, (b) the numerical differences in the sensor response of respective sensors on day '0' and day '7'. Both MIP-QCM and NIP-QCM sensors show good inter-day stability.

**Table S1:** Recipes using different combinations of monomers and solvents for the synthesis of MIPs at 60°C.

| MIP systems | MAA          | EGDMA        | MMA         | Styrene      | DVB          | Artemether  | AIBN        | Solvent          |
|-------------|--------------|--------------|-------------|--------------|--------------|-------------|-------------|------------------|
| Recipe 1    | ✓<br>(15 µL) | ✓<br>(30 µL) | -           | -            | -            | ✓<br>(5 mg) | ✓<br>(5 mg) | DMSO<br>(600 µL) |
| Recipe 2    | ✓<br>(8 µL)  | -            | -           | ✓<br>(8 µL)  | ✓<br>(60 µL) | ✓<br>(5 mg) | ✓<br>(5 mg) | THF<br>(1000 µL) |
| Recipe 3    | -            | -            | -           | ✓<br>(15 µL) | ✓<br>(60 µL) | ✓<br>(5 mg) | ✓<br>(5 mg) | THF<br>(1000 µL) |
| Recipe 4    | -            | -            | -           | ✓<br>(15 µL) | ✓<br>(60 µL) | ✓<br>(5 mg) | ✓<br>(5 mg) | DMF<br>(1000 µL) |
| Recipe 5    | ✓<br>(8 µL)  | ✓<br>(32 µL) | ✓<br>(8 µL) | -            | -            | ✓<br>(5 mg) | ✓<br>(5 mg) | DMSO<br>(600 µL) |

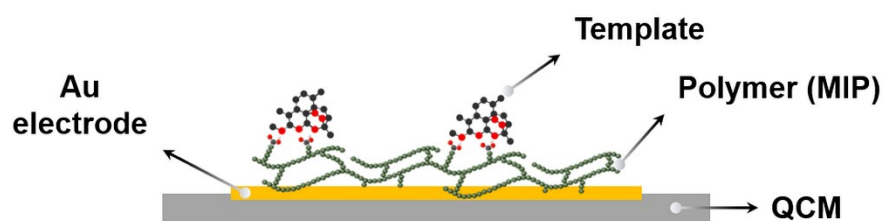

**Fabrication of MIP on QCM electrode:  
Template is linked to the MIP through hydrogen bonds**

**Figure S1.** A schematic of the MIP-QCM sensor showing the fabrication of MIP on the surface of Au electrode. The prepolymer containing self-organized oligomers and template molecules are spin coated and polymerized to fabricate MIP-QCM sensors for artemether detection. The non-covalent interactions such as hydrogen bonds between H-bond acceptor artemether and H-bond donor methacrylic acid derive imprinting and impart selectivity to the MIP.

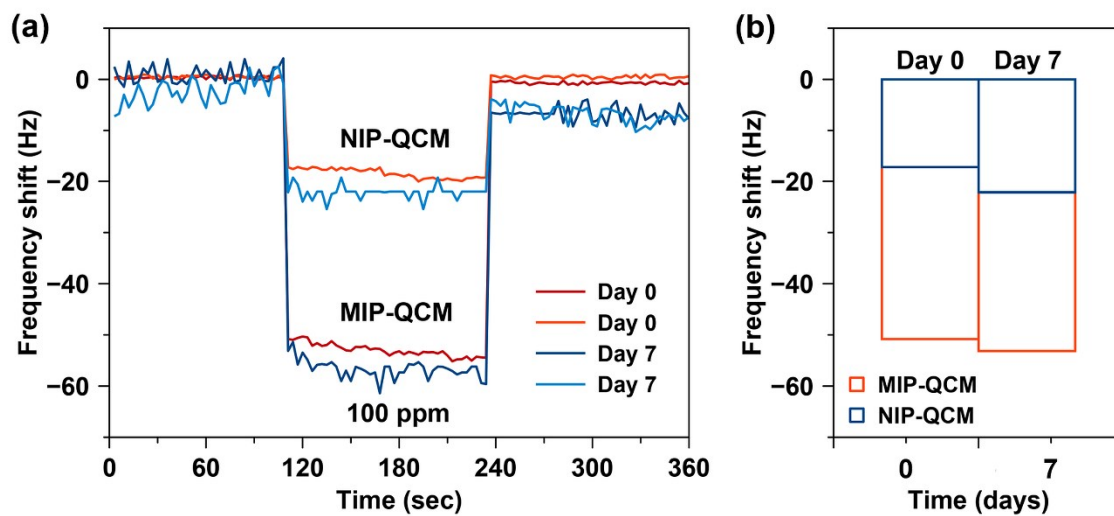

**Figure S2.** (a) The sensor response of MIP-QCM and NIP-QCM layers after a week of testing, (b) the numerical differences in the sensor response of respective sensors on day '0' and day '7'. Both MIP-QCM and NIP-QCM sensors show good inter-day stability.
